# Supplementary material for: Visual deterioration in patients with photoreceptor loss after retinal reattachment surgery
Source: PubMed Central journal article supplement (PMC9203401; doi:10.1007/s00417-021-05519-z), 2022-01-26

# VISUAL DETERIORATION IN PATIENTS WITH PHOTORECEPTOR LOSS AFTER RETINAL REATTACHMENT SURGERY

Rasool S, Kaushik M, Chaudhary R, Blachford K, Berry M, Scott RAH, Logan A, Blanch RJ.

Supplementary Figure 1. Modelled relationship between outer nuclear layer thickness (ONL;  $\mu\text{m}$ ) and Humphrey Visual Field sensitivity (HVF; dB).

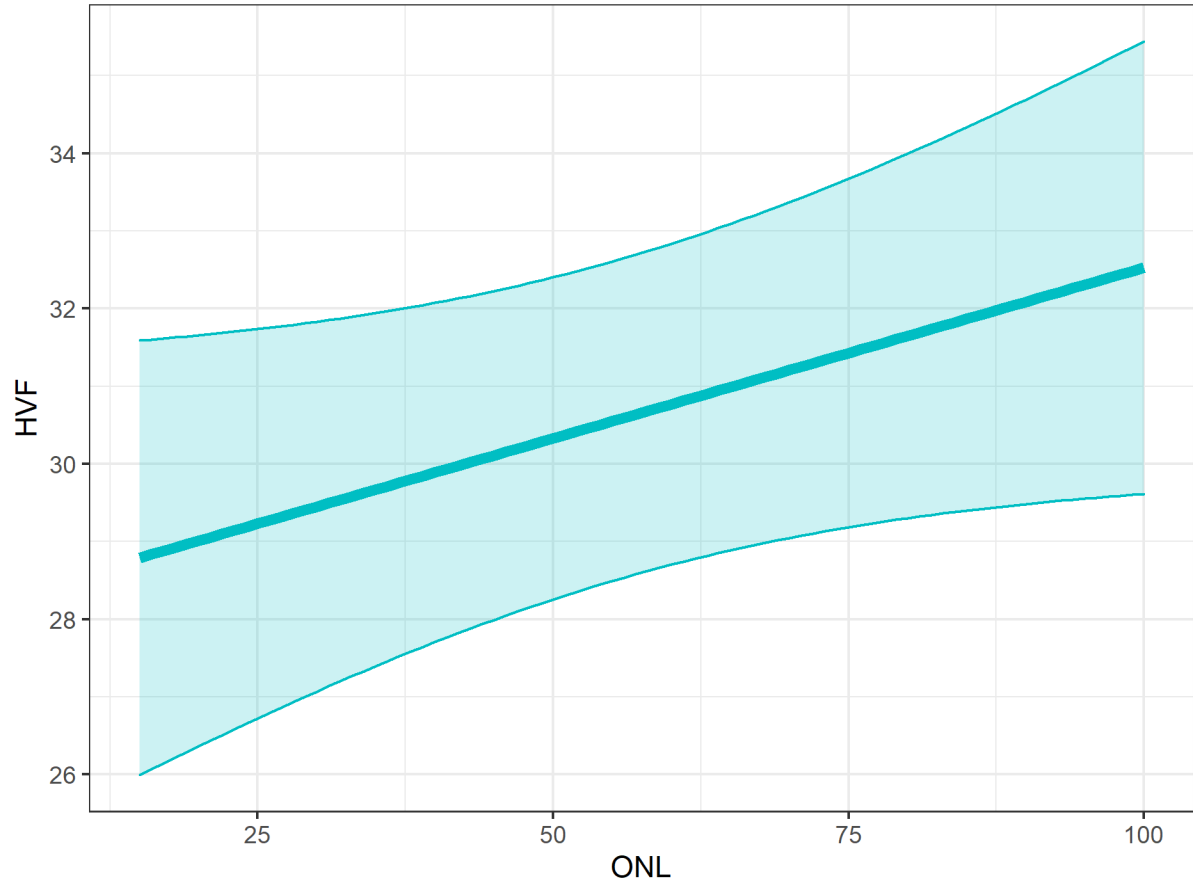

Supplement: 417_2021_5519_MOESM1_ESM.pdf [file 417_2021_5519_MOESM1_ESM.pdf]
